# Supplementary material for: A cognitive approach to better understand foraging strategies of the adult domestic hen
Source: Research Square preprint supplement (doi:10.21203/rs.3.rs-4121447/v1), 2024-04-12

## Supplementary Information

### A cognitive approach to better understand foraging strategies of the adult domestic hen

Degrande R.<sup>a</sup> \*, Cornilleau F.<sup>a</sup>, Jardat P.<sup>a</sup>, Ferreira V.H.B.<sup>a</sup>, Lansade L.<sup>a</sup>, Calandreau L.<sup>a</sup>

<sup>a</sup>CNRS, IFCE, INRAE, Université de Tours, PRC (Physiologie de la Reproduction et des Comportements), F-37380, Nouzilly, Indre-et-Loire, France

\* Corresponding author: [rachel.degrande@gmail.com](mailto:rachel.degrande@gmail.com)

**Table SI 1:** Mean performance +/- SD (%) for each trial type at each stage. For each line, the p-value from the comparison with the chance level is detailed (Wilcoxon test). • = statistical tendencies ( $P < 0.1$ ) considered when tested individuals are four.

| Stage                                         | Trial type | Mean (%) | Sd (%) | P (vs 50%) |
|-----------------------------------------------|------------|----------|--------|------------|
| Free-choice test, <i>M</i> -sessions          | vPT        | 89.58    | 10.73  | 0.0023     |
|                                               | nvPT       | 43.05    | 12.22  | 0.073      |
|                                               | CT         | 92.36    | 7.5    | 0.0021     |
|                                               | ST         | 48.26    | 9.14   | 0.60       |
| Free-choice test, <i>P</i> -sessions          | vPT        | 94.45    | 11.42  | 0.0015     |
|                                               | nvPT       | 31.95    | 12.22  | 0.022      |
| Group 1: Different object                     | vPT        | 95.83    | 6.97   | 0.031      |
|                                               | nvPT       | 29.17    | 18.07  | 0.057      |
| Group 2: Forced-choice test, 2 first sessions | vPT        | 97.22    | 6.81   | 0.026      |
|                                               | nvPT       | 42.59    | 25.50  | 0.58       |
| Group 2: Forced-choice test, 2 final sessions | vPT        | 91.67    | 9.62   | 0.095 •    |
|                                               | nvPT       | 83.33    | 7.85   | 0.098 •    |
| Group 2: Forced-choice test, control sessions | CT         | 100      | 0      | 0.072 •    |
|                                               | ST         | 52.08    | 4.17   | 1 •        |

**Table SI 2:** Result for the post-hoc comparisons between each tested condition with a Tukey HSD post-hoc test, with the absolute value of Cohen's d effect size for each comparison. Performance nvPT trials was calculated over 2 sessions for each tested condition to get a relevant number of trials for the analysis (i.e. at least 12 trials). Cohen's d is commonly described as weak at and under 0.2, mean around 0.5 and strong at and over 0.8.

| Test conditions compared                   |                                             | Difference | Lower  | Upper  | Adjusted<br><i>P</i> -value | Effect size<br>(abs.<br>Cohen's d) |
|--------------------------------------------|---------------------------------------------|------------|--------|--------|-----------------------------|------------------------------------|
| <b>Forced-choice, 2<br/>last sessions</b>  | Forced-choice, 2 first<br>sessions (group2) | -40.74     | -74.25 | -7.23  | 0.01                        | 1.78                               |
|                                            | Free-choice, <i>M</i> -sessions             | -40.28     | -70.25 | -10.31 | < .0001                     | 3.33                               |
|                                            | Free-choice, <i>P</i> -sessions             | -51.39     | -81.36 | -21.41 | < .0001                     | 2.60                               |
|                                            | Free-choice with another<br>object (group1) | -54.17     | -87.68 | -20.66 | < .0001                     | 3.25                               |
| <b>Forced-choice, 2<br/>first sessions</b> | Free-choice, <i>M</i> -sessions             | 0.46       | -25.50 | 26.42  | 1.00                        | 0.025                              |
|                                            | Free-choice, <i>P</i> -sessions             | -10.65     | -36.61 | 15.31  | 0.76                        | 0.455                              |
|                                            | Free-choice with another<br>object (group1) | -13.43     | -43.40 | 16.55  | 0.70                        | 0.561                              |
| <b>Free-choice,<br/>Msessions</b>          | Free-choice, <i>P</i> -sessions             | -11.11     | -32.30 | 10.08  | 0.56                        | 0.632                              |
|                                            | Free-choice with another<br>object (group1) | -13.89     | -39.84 | 12.07  | 0.55                        | 0.924                              |
| <b>Free-choice,<br/>Psessions</b>          | Free-choice with another<br>object (group1) | -2.78      | -28.74 | 23.18  | 1.00                        | 0.133                              |

**Table SI 3:** Analysis of the effect of the individual identity and the trial type on the side chosen first, at each trial, during the *M-sessions* in free-choice conditions. Both the individual identity and the trial type have a significant impact on the side chosen first. The generalized mixed model table is not detailed (median of deviance residuals = -0.51). The results of post-hoc Kruskal Wallis are detailed for the variable Individual and the variable Trial type. The Dunn post-hoc test (Holm correction) is detailed to compare the side chosen first according to the trial type.

| Kruskal-Wallis rank sum test | Chi2 | df    | p-value   |
|------------------------------|------|-------|-----------|
| Side chosen ~ Individual     |      | 162   | 11 <0.001 |
| Side chosen ~ Trial type     |      | 17.68 | 3 <0.001  |

**Dunn test with Holm correction**

| Group 1 | Group 2 | statistic | Adjusted p-value |
|---------|---------|-----------|------------------|
| CT      | nvPT    | -2.86     | 0.020            |
|         | vPT     | -0.490    | 1                |
|         | ST      | -3.44     | 0.0035           |
| nvPT    | vPT     | 2.37      | 0.054            |
|         | ST      | -0.141    | 1                |
| vPT     | ST      | -2.87     | 0.020            |

**Table SI 4:** Model selection for the effect of the trial configuration (ST, nvPT, vPT and ST), the visibility of the reward (visible or non-visible), and the presence of a tube with a visible content in the trial (CT, vPT or nvPT) or not (ST). The more accurate model has the smallest corrected Akaike Information Criterion value.

| AICc model selection                       | K  | AICc   |
|--------------------------------------------|----|--------|
| Side chosen ~ trial type + individual      | 15 | 761.35 |
| Side chosen ~ reward_visible + individual  | 13 | 757.67 |
| Side chosen ~ content_visible + individual | 13 | 770.13 |

**Table SI 5:** The generalized linear model table for the effect of the side of the reward and the visibility of the reward on the performance at each trial, whatever the trial type (individuals as random effects, binomial family).

| Random effects | Variance | Std. Dev. |
|----------------|----------|-----------|
| Individuals    | 0.23     | 0.48      |

  

| Fixed Effects            | Estimate | Std. Error | Z value | Pr(< z ) |
|--------------------------|----------|------------|---------|----------|
| Intercept                | 0.77     | 0.17       | 4.46    | <0.001   |
| Side of the reward       | -2.16    | 0.15       | -14.05  | <0.001   |
| Visibility of the reward | 3.46     | 0.20       | 17.10   | <0.001   |

**Figure SI 6:** Detail of the number of time individuals choose to search the reward in one side or the other (percentage of success) depending on the trial type, the test condition, at the group level.

There was a significant effect of the trial type on the side chosen first ( $P < 0.05$  between CT-nvPT, CT-ST and vPT-ST), but no effect of the test condition. Thus, there was an effect of the side of the reward location on the performance, with a significant side bias for right over left in nvPT and ST but no significant difference in CT and vPT. For each boxplot, dots are the mean individual performances, vertical lines are standard deviation, and the horizontal line shows the median value.

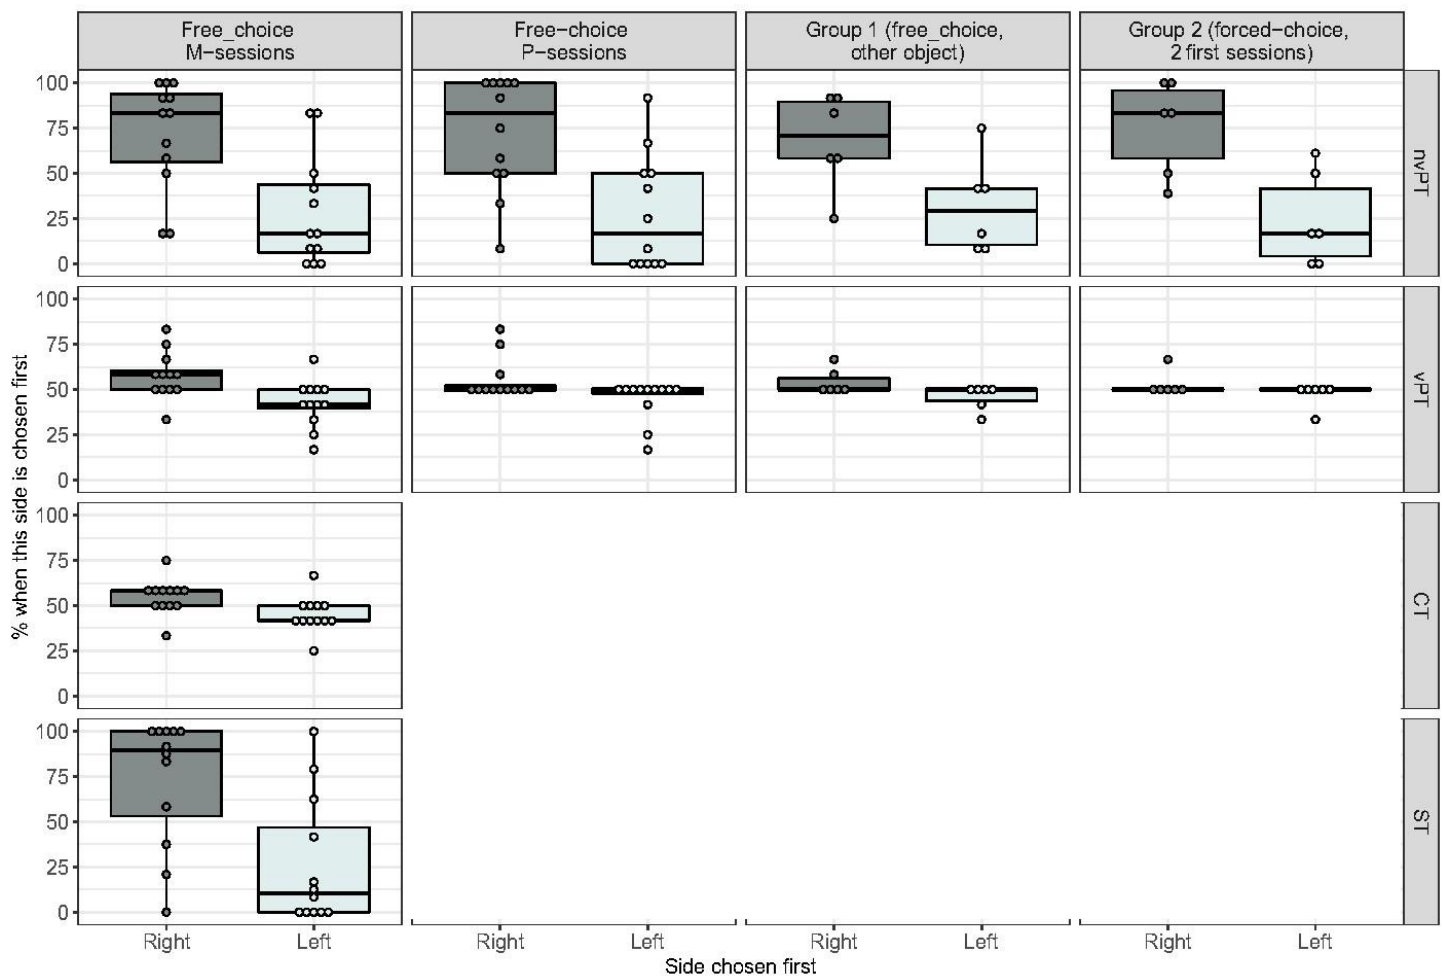

Supplement: Supplementary file 1 [file 0bb03c3a215760fa3981aa34.pdf]
